# Supplementary material for: Downstream Paclitaxel Released Following Drug-Coated Balloon Inflation and Distal Limb Wound Healing in Swine
Source: PubMed Central journal article supplement — JACC Basic Transl Sci. 2021 Mar 31;6(5):416–27. doi: 10.1016/j.jacbts.2021.01.012 (PMC8165120; doi:10.1016/j.jacbts.2021.01.012), 2021-03-31

SUPPLEMENTAL MATERIAL

**Supplemental Figure 1.** Mean Margin Separation score on a per animal basis plotted at each time point (**upper panel**) and the individual animal scores at each time point in each of the 3 study groups showing distribution around the mean score, represented by a line (**lower panels**), demonstrate even distribution around the mean, with greatest variability occurring in the 7 to 14-day time period, reflecting, as anticipated, normal variation in the healing response of wounds within individual animals.

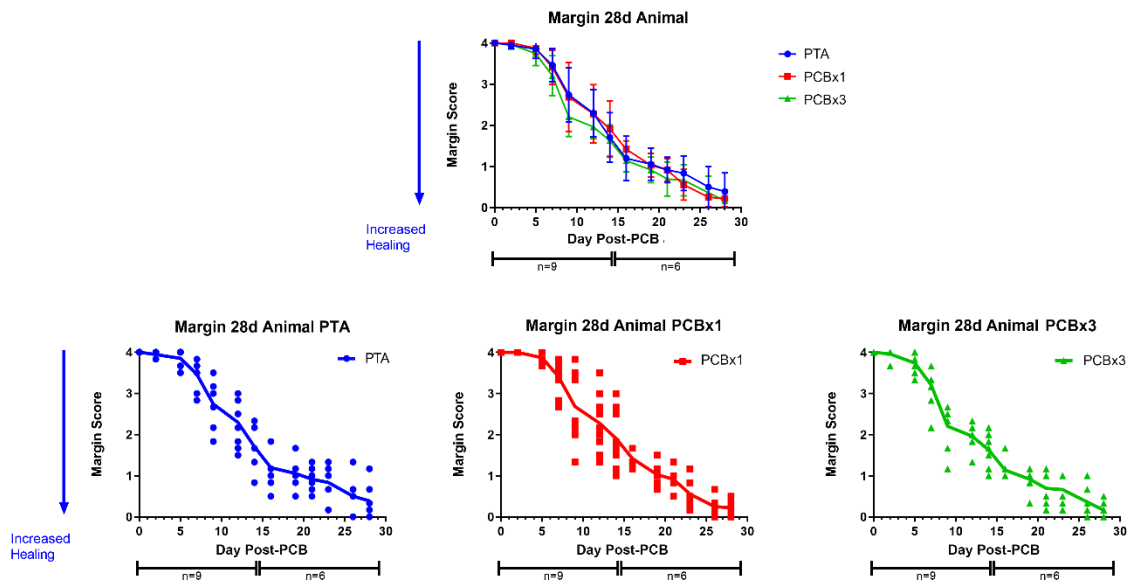

**Supplemental Figure 2. Mean Exudate score on a per animal basis.** Scores plotted at each time point (**upper panel**) and the individual animal scores at each time point in each of the 3 study groups showing distribution around the mean score, represented by a line (**lower panels**), demonstrate even distribution around the mean, with greatest variability occurring in the 7 to 14-day time period, reflecting, as anticipated, normal variation in the healing response of wounds within individual animals.

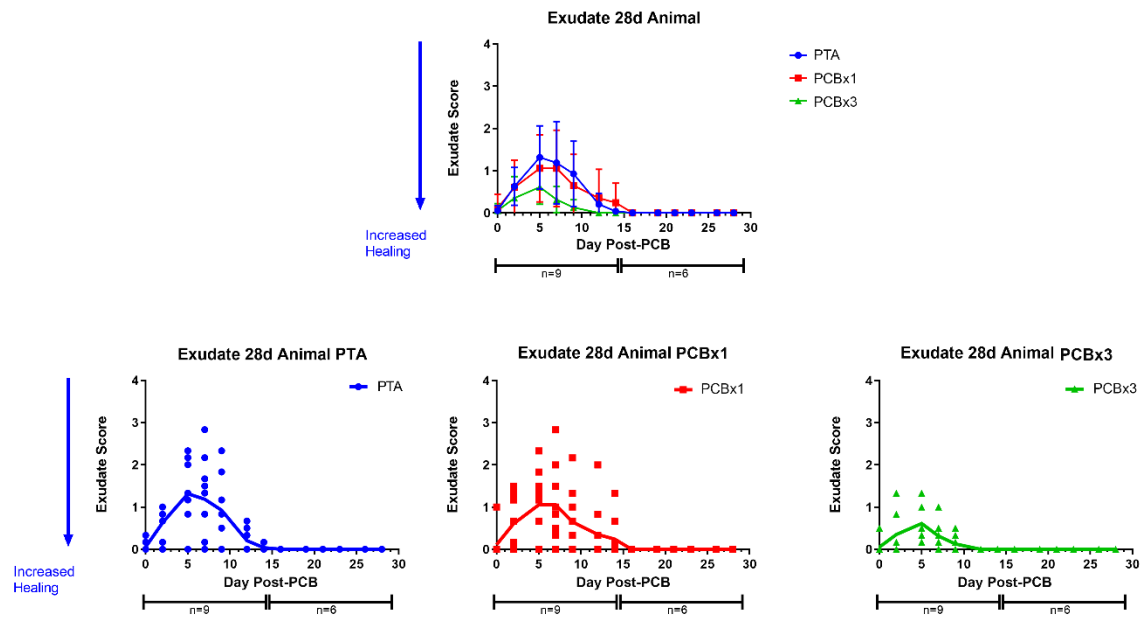

**Supplemental Figure 3. Margin Separation scores plotted for each group based on top, middle or bottom location on the leg.** No consistent and obvious differences in healing rate are apparent based upon location of the wound in the leg.

PTA Margin Scores by Position

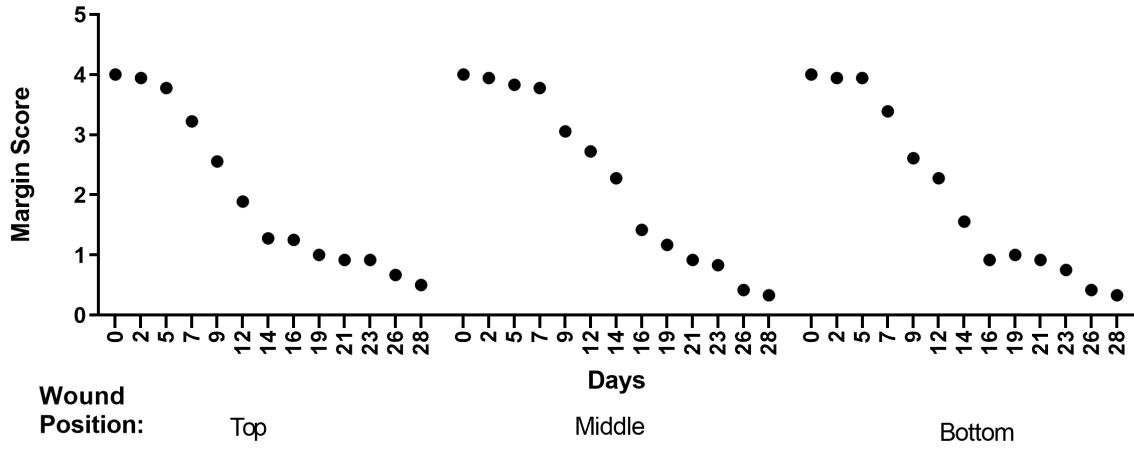

PCBx1 Margin Scores by Position

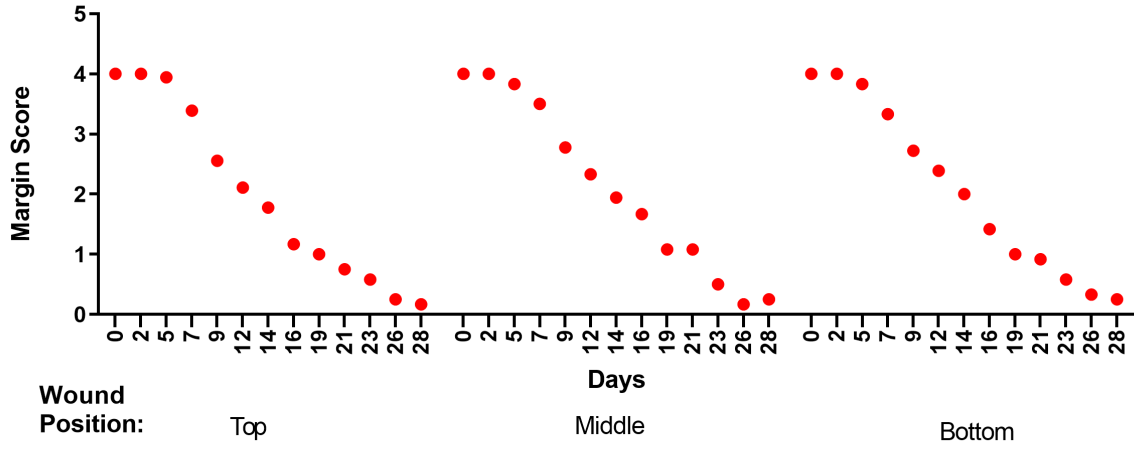

PCBx3 Margin Scores by Position

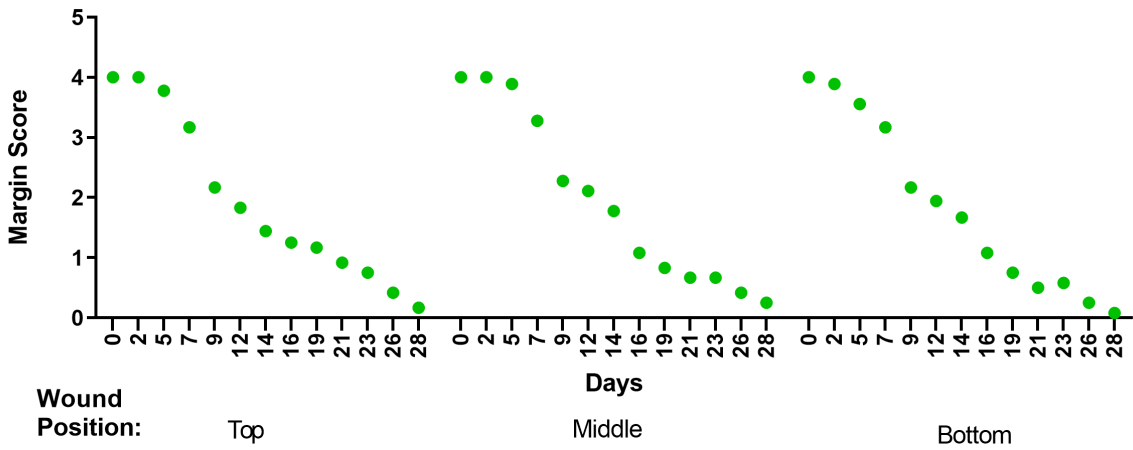

Supplement: mmc1.pdf [file mmc1.pdf]
